# Supplementary material for: Exploring the interactions of urinary metals and the mediating role of oxidative stress in Parkinson's disease risk: an epidemiological study in the elderly
Source: Royal Society of Chemistry journal article supplement (doi:10.1039/d5em00166h), 2025-01-01
Supplement: d5em00166h1.pdf [file d5em00166h1.pdf]

# **Exploring the Interactions of Urinary Metals and the Mediating Role of Oxidative Stress in Parkinson's Disease Risk: An Epidemiological Study in the Elderly**

Chiqun Shan <sup>a,1</sup>, Quanzhi Zheng <sup>a,1</sup>, Mengyan Li <sup>b</sup>, Yiming Ge <sup>a</sup>, Junye Bian <sup>a</sup>,  
Zhihong Huang <sup>a</sup>, Zhihui Guo <sup>a</sup>, Yuxuan Jiang <sup>b</sup>, Pan Xu <sup>b</sup>, Shaoyou Lu <sup>a,\*</sup>, Haobo  
Chen <sup>b,\*</sup>

<sup>a</sup> School of Public Health (Shenzhen), Shenzhen Campus of Sun Yat-sen University,  
Shenzhen, 518107, China

<sup>b</sup> Department of Neurology, Guangzhou First People's Hospital, South China  
University of Technology, Guangzhou, 510000, China

<sup>1</sup>: These authors contributed equally to this work.

**\*Corresponding author:** [eychb@scut.edu.cn](mailto:eychb@scut.edu.cn) (H Chen),

[lushy23@mail.sysu.edu.cn](mailto:lushy23@mail.sysu.edu.cn) (S Lu)

## Reagent and materials

The mixed metal standard solution (1000 mg L<sup>-1</sup>) containing manganese (Mn), iron (Fe), copper (Cu), zinc (Zn), cobalt (Co), selenium (Se), chromium (Cr), nickel (Ni), cadmium (Cd), and lead (Pb) was purchased from Agilent Technologies (Santa Clara, CA, USA). 8-OHdG and its internal standard, 8-OHdG-15N5 (25 mg L<sup>-1</sup>) were purchased from Sigma-Aldrich (Darmstadt, Germany). Methanol (chromatographic grade,  $\geq 99.0\%$ ), acetonitrile (chromatographic grade,  $\geq 99.0\%$ ), and  $\beta$ -glucuronidase ( $> 100000$  units mL<sup>-1</sup>) were obtained from CNW (Shanghai, China). Ammonium acetate ( $\geq 98.0\%$ ) was purchased from Macklin (Shanghai, China). Nitric acid (65%) was also purchased from Sigma-Aldrich (Darmstadt, Germany). Deionized water was prepared using a water purification system (Millipore, Billerica, MA, USA).

## Sample preparation

Urine samples were taken out from the -80°C refrigerator and thawed in the 4 °C refrigerator. After complete thawing, urine samples were mixed upside down twice. Then 800  $\mu$ L of urine sample was transferred to a plastic tube and centrifuged at 8000 rpm for 5 min. Subsequently, 0.5 mL of supernatant was transferred to a 15 mL plastic tube, added with 9.5 mL of 1% HNO<sub>3</sub>, and subjected to instrumental analysis.

The preparation of urinary 8-OHdG was according to a procedure described previously (Fu et al., 2024). After the urine sample was pre-thawed, take 1 mL of urine into a labeled glass tube with a lid. A mixed internal standard solution of 40  $\mu$ L with a concentration of 100  $\mu$ g L<sup>-1</sup> was vertically added to the sample, followed by 1 mL ammonium acetate buffer solution, and 20  $\mu$ L  $\beta$ -glucuronidase was added to the sample. The sample was subjected to enzymatic hydrolysis at 37 °C and a dark water bath for 12-16 h. The HC-C18 solid phase extraction column was installed on the

solid-phase extraction device. 5 mL methanol and 10 mL ultra-pure water were added successively to activate the column. After the activation was completed, the sample was poured into the column, and the glass tube was rinsed with 1 mL 5% methanol aqueous solution. After vortex shaking, the rinsing solution was poured into the column. After the liquid is completely drained, turn on the vacuum pump and run for 1 min to ensure that the solid phase extraction column is completely drained. The corresponding labeled glass test tube was placed in the solid phase extraction device to accept the eluent, and the sample was added to the 4 mL acetonitrile elution column. After the acetonitrile dried naturally, the sample was vacuumed again for 1 min. The test tube containing the eluent was installed on the nitrogen blower, and the nitrogen was concentrated until it was nearly dry. 400  $\mu$ L of 60% methanol aqueous solution was added into the glass tube for redissolution. After vortex shock, the filtered samples were transferred to the sample vial equipped with a glass-lined tube and stored in the refrigerator at -20 °C for detection.

**Table S1 Instrumental parameters of ICP-MS**

| Parameters                             | Value                           |
|----------------------------------------|---------------------------------|
| Plasma radio frequency power           | 1500 W                          |
| Plasma gas flow rate                   | 15 L min <sup>-1</sup>          |
| Carrier gas                            | High purity argon gas (99.999%) |
| Carrier gas flow rate                  | 0.10 L min <sup>-1</sup>        |
| Auxiliary air velocity                 | 0.10 L min <sup>-1</sup>        |
| Atomizing pump                         | 0.10 rps                        |
| S/C temperature                        | 2°C                             |
| Depth of sampling                      | 8.0 mm                          |
| resolution                             | 0.6—0.7 amu                     |
| Number of scans                        | 3                               |
| Helium flow rate in the collision cell | 5.0 L min <sup>-1</sup>         |
| Pattern                                | KED Pattern                     |

**Table S2 Information on the mass spectra of 8-OHdG**

| Classification   | Name of standard                     | Q1 (DA) | Q3 (DA) | DP (V) | CE (V) | Retention time (msec) |
|------------------|--------------------------------------|---------|---------|--------|--------|-----------------------|
| Markers of       | 8-OHdG                               | 282.2   | 192.0   | -144.0 | -18.0  | 25.0                  |
| oxidative stress | 8-OHdG- <sup>15</sup> N <sub>5</sub> | 287.0   | 197.0   | -105.0 | -25.0  | 25.0                  |

DP: Declustering potential; CE: Collision energy.

**Table S3 Liquid phase gradient elution procedure for 8-OHdG detection**

| Time (min) | Mobile phase A (%) | Mobile phase B (%) |
|------------|--------------------|--------------------|
| 0.00       | 95.0               | 5.00               |
| 1.00       | 80.0               | 20.0               |
| 12.0       | 5.00               | 95.0               |
| 13.0       | 95.0               | 5.00               |
| 18.0       | 95.0               | 5.00               |

Mobile phase A: ultrapure water; Mobile phase B: pure methanol.

**Table S4 Evaluation of urinary heavy metals and 8-OHdG detection methods  
and quality control indicators**

| Substances | Standard curve         | $R^2$ | LOD ( $\mu\text{g L}^{-1}$ ) | LOQ ( $\mu\text{g L}^{-1}$ ) | Standard recovery (%) |
|------------|------------------------|-------|------------------------------|------------------------------|-----------------------|
| Mn         | $y = 1.187x - 0.042$   | 0.999 | 0.043                        | 0.128                        | 107                   |
| Fe         | $y = 1.962x + 4.632$   | 0.999 | 0.391                        | 1.172                        | 99.0                  |
| Cu         | $y = 4.435x + 1.231$   | 0.999 | 0.054                        | 0.162                        | 95.4                  |
| Zn         | $y = 0.712x - 0.088$   | 0.999 | 0.066                        | 0.197                        | 102                   |
| Co         | $y = 5.727x + 0.004$   | 0.999 | 0.003                        | 0.008                        | 100                   |
| Se         | $y = 0.008x - 0.001$   | 0.999 | 0.436                        | 1.307                        | 118                   |
| Cr         | $y = 2.583x + 1.332$   | 0.999 | 0.009                        | 0.027                        | 97.2                  |
| Ni         | $y = 1.649x + 0.013$   | 0.999 | 0.018                        | 0.054                        | 99.3                  |
| Cd         | $y = 0.109x - 0.00008$ | 0.999 | 0.00005                      | 0.0001                       | 101                   |
| Sn         | $y = 0.075x + 0.002$   | 0.999 | 0.022                        | 0.067                        | 106                   |
| Pb         | $y = 0.189x + 0.005$   | 0.999 | 0.018                        | 0.054                        | 112                   |
| 8-OHdG     | $y = 18411x + 492$     | 0.999 | 0.056                        | 0.167                        | 76.4                  |

$R^2$ : Standard curve correlation coefficient.

## Reference

- Fu, J., Yao, Y., Huang, Z., Guo, Z., Chen, X., Tang, X., Ge, Y., Xiao, Q., Sha, Y., Lu, S., 2024. Sex-Specific and Trimester-Specific Associations of Prenatal Exposure to Bisphenols, Parabens, and Triclosan with Neonatal Birth Size and Gestational Age. *Environ. Sci. Technol.* 58, 13687–13696. <https://doi.org/10.1021/acs.est.4c04940>
